# Supplementary material for: Genome-wide comparison of Asian and African rice reveals high recent activity of DNA transposons
Source: PubMed Central journal article supplement (PMC4423477; doi:10.1186/s13100-015-0040-x), 2015-04-28
Supplement: 13100_2015_40_MOESM2_ESM.pdf [file 13100_2015_40_MOESM2_ESM.pdf]

**Table S1: Overview of TE abundance in *O. sativa* and *O. glaberrima***

| TE family              | Copy number | Basepairs occupied | TE family              | Copy number | Basepairs occupied |
|------------------------|-------------|--------------------|------------------------|-------------|--------------------|
| <b>Mariner (DTT)</b>   |             |                    | <b>Mariner (DTT)</b>   |             |                    |
| <i>DTT_SA</i>          | 1875        | 220102             | <i>DTT_SA</i>          | 1648        | 181016             |
| <i>DTT_SAA</i>         | 214         | 30225              | <i>DTT_SAA</i>         | 195         | 27307              |
| <i>DTT_SAB</i>         | 79          | 5532               | <i>DTT_SAB</i>         | 88          | 6046               |
| <i>DTT_SAC</i>         | 115         | 10490              | <i>DTT_SAC</i>         | 106         | 9467               |
| <i>DTT_SAD</i>         | 1123        | 227077             | <i>DTT_SAD</i>         | 1017        | 204483             |
| <i>DTT_SAF</i>         | 699         | 87565              | <i>DTT_SAF</i>         | 556         | 64707              |
| <i>DTT_SB</i>          | 3995        | 487174             | <i>DTT_SB</i>          | 3624        | 436358             |
| <i>DTT_SC</i>          | 684         | 189223             | <i>DTT_SC</i>          | 587         | 158365             |
| <i>DTT_SD</i>          | 411         | 80172              | <i>DTT_SD</i>          | 376         | 70226              |
| <i>DTT_SE</i>          | 905         | 208112             | <i>DTT_SE</i>          | 811         | 176028             |
| <i>DTT_SG</i>          | 2403        | 461442             | <i>DTT_SG</i>          | 2057        | 369602             |
| <i>DTT_SH</i>          | 2060        | 347765             | <i>DTT_SH</i>          | 1717        | 276194             |
| <i>DTT_SI</i>          | 1063        | 213576             | <i>DTT_SI</i>          | 834         | 155155             |
| <i>DTT_SJ</i>          | 2354        | 247948             | <i>DTT_SJ</i>          | 1809        | 184912             |
| <i>DTT_SK</i>          | 496         | 101186             | <i>DTT_SK</i>          | 423         | 84172              |
| <i>DTT_SM</i>          | 2066        | 311754             | <i>DTT_SM</i>          | 1842        | 272368             |
| <i>DTT_SN</i>          | 241         | 53984              | <i>DTT_SN</i>          | 223         | 47322              |
| <i>DTT_SQ</i>          | 362         | 101019             | <i>DTT_SQ</i>          | 332         | 91256              |
| <i>DTT_SR</i>          | 25          | 1466               | <i>DTT_SR</i>          | 22          | 1405               |
| <i>DTT_SS</i>          | 803         | 151830             | <i>DTT_SS</i>          | 674         | 126381             |
| <i>DTT_ST</i>          | 612         | 57018              | <i>DTT_ST</i>          | 528         | 50283              |
| <i>DTT_SU</i>          | 148         | 31354              | <i>DTT_SU</i>          | 134         | 26756              |
| <i>DTT_SV</i>          | 173         | 14586              | <i>DTT_SV</i>          | 140         | 11312              |
| <i>DTT_SW</i>          | 978         | 177161             | <i>DTT_SW</i>          | 892         | 160136             |
| <i>DTT_SX</i>          | 304         | 50554              | <i>DTT_SX</i>          | 285         | 44965              |
| <b>Harbinger (DTH)</b> |             |                    | <b>Harbinger (DTH)</b> |             |                    |
| <i>DTH_Baba</i>        | 52          | 14208              | <i>DTH_Baba</i>        | 53          | 18994              |
| <i>DTH_Blip</i>        | 68          | 51555              | <i>DTH_Blip_A</i>      | 55          | 24292              |
| <i>DTH_OsKong</i>      | 57          | 25927              | <i>DTH_Kong</i>        | 62          | 32367              |
| <i>DTH_Pong</i>        | 19          | 34467              | <i>DTH_Pong</i>        | 9           | 861                |
| <i>DTH_TA</i>          | 467         | 113832             | <i>DTH_TA</i>          | 464         | 111840             |
| <i>DTH_TAA</i>         | 288         | 68227              | <i>DTH_TAA</i>         | 242         | 56944              |
| <i>DTH_TAB</i>         | 143         | 26155              | <i>DTH_TAB</i>         | 141         | 24325              |
| <i>DTH_TAC</i>         | 48          | 6988               | <i>DTH_TAC</i>         | 34          | 4959               |
| <i>DTH_TAD</i>         | 1078        | 131160             | <i>DTH_TAD</i>         | 877         | 104864             |
| <i>DTH_TAE</i>         | 3022        | 332569             | <i>DTH_TAE</i>         | 2426        | 254810             |
| <i>DTH_TAF</i>         | 22          | 1733               | <i>DTH_TAF</i>         | 17          | 1268               |
| <i>DTH_TAG</i>         | 45          | 43781              | <i>DTH_TAG</i>         | 25          | 15312              |
| <i>DTH_TAH</i>         | 19          | 7408               | <i>DTH_TAH</i>         | 24          | 34369              |
| <i>DTH_TAI</i>         | 3028        | 601035             | <i>DTH_TAI</i>         | 2764        | 539866             |
| <i>DTH_TAJ</i>         | 179         | 29184              | <i>DTH_TAJ</i>         | 192         | 32186              |
| <i>DTH_TAK</i>         | 2           | 172                | <i>DTH_TAK</i>         | 3           | 343                |
| <i>DTH_TAL</i>         | 793         | 88893              | <i>DTH_TAL</i>         | 672         | 73764              |
| <i>DTH_TAO</i>         | 20          | 3591               | <i>DTH_TAO</i>         | 19          | 3790               |
| <i>DTH_TAP</i>         | 14          | 3840               | <i>DTH_TAP</i>         | 11          | 2492               |
| <i>DTH_TAS</i>         | 146         | 20824              | <i>DTH_TAS</i>         | 129         | 18983              |
| <i>DTH_TAU</i>         | 161         | 29966              | <i>DTH_TAU</i>         | 159         | 29709              |
| <i>DTH_TB</i>          | 109         | 13418              | <i>DTH_TB</i>          | 100         | 13224              |

|         |      |        |         |      |        |
|---------|------|--------|---------|------|--------|
| DTH_TC  | 1479 | 396387 | DTH_TC  | 1202 | 301632 |
| DTH_TD  | 131  | 9861   | DTH_TD  | 131  | 9989   |
| DTH_TE  | 510  | 123104 | DTH_TE  | 457  | 110322 |
| DTH_TF  | 1919 | 510105 | DTH_TF  | 1745 | 452018 |
| DTH_TG  | 937  | 165320 | DTH_TG  | 796  | 135686 |
| DTH_TI  | 93   | 8782   | DTH_TI  | 89   | 8309   |
| DTH_TO  | 3216 | 649618 | DTH_TO  | 2955 | 595783 |
| DTH_TR  | 581  | 148381 | DTH_TR  | 399  | 99413  |
| DTH_TS  | 1604 | 382053 | DTH_TS  | 1183 | 264822 |
| DTH_TT  | 505  | 43261  | DTH_TT  | 389  | 33702  |
| DTH_TU  | 103  | 11833  | DTH_TU  | 93   | 11767  |
| DTH_TV  | 224  | 34958  | DTH_TV  | 207  | 32864  |
| DTH_TW  | 50   | 9428   | DTH_TW  | 83   | 18463  |
| DTH_TY  | 152  | 26244  | DTH_TY  | 102  | 16642  |
| DTH_TZ  | 147  | 69196  | DTH_TZ  | 133  | 56429  |
| DTH_XAB | 240  | 31875  | DTH_XAB | 228  | 30750  |
| DTH_TX  | 294  | 92639  | DTH_TX  | 261  | 76059  |

**Mutator (DTM)**

|         |      |         |
|---------|------|---------|
| DTM_HA  | 63   | 20859   |
| DTM_MA  | 302  | 65813   |
| DTM_MAA | 212  | 60199   |
| DTM_MAB | 86   | 11320   |
| DTM_MAC | 308  | 56505   |
| DTM_MAD | 2    | 1460    |
| DTM_MAE | 110  | 39384   |
| DTM_MAF | 1408 | 234586  |
| DTM_MAG | 296  | 38061   |
| DTM_MB  | 202  | 94427   |
| DTM_MC  | 251  | 138810  |
| DTM_MD  | 152  | 47055   |
| DTM_ME  | 622  | 110170  |
| DTM_MF  | 64   | 27840   |
| DTM_MG  | 74   | 29566   |
| DTM_MH  | 78   | 11493   |
| DTM_MJ  | 165  | 21874   |
| DTM_MK  | 672  | 1449063 |
| DTM_MN  | 903  | 111517  |
| DTM_MP  | 200  | 54956   |
| DTM_MQ  | 118  | 48022   |
| DTM_MR  | 113  | 20488   |
| DTM_MS  | 4    | 2385    |
| DTM_MT  | 5    | 1286    |
| DTM_MU  | 131  | 26646   |
| DTM_MX  | 293  | 30976   |
| DTM_MY  | 37   | 6092    |
| DTM_MZ  | 123  | 13345   |
| DTM_XB  | 326  | 44185   |

**Mutator (DTM)**

|         |      |        |
|---------|------|--------|
| DTM_HA  | 71   | 22988  |
| DTM_MA  | 336  | 63054  |
| DTM_MAA | 155  | 37006  |
| DTM_MAB | 79   | 11603  |
| DTM_MAC | 263  | 47824  |
| DTM_MAD | 1    | 725    |
| DTM_MAE | 79   | 27487  |
| DTM_MAF | 1232 | 207802 |
| DTM_MAG | 265  | 32721  |
| DTM_MB  | 196  | 93935  |
| DTM_MC  | 255  | 89392  |
| DTM_MD  | 143  | 42924  |
| DTM_ME  | 542  | 93838  |
| DTM_MF  | 78   | 32919  |
| DTM_MG  | 46   | 26597  |
| DTM_MH  | 74   | 10580  |
| DTM_MJ  | 124  | 15785  |
| DTM_MK  | 296  | 203120 |
| DTM_MN  | 785  | 89989  |
| DTM_MP  | 161  | 40220  |
| DTM_MQ  | 74   | 25182  |
| DTM_MR  | 87   | 14383  |
| DTM_MS  | 8    | 6766   |
| DTM_MT  | 12   | 2522   |
| DTM_MU  | 126  | 20587  |
| DTM_MX  | 269  | 27413  |
| DTM_MY  | 29   | 4729   |
| DTM_MZ  | 113  | 13898  |
| DTM_XB  | 305  | 40352  |

**CACTA (DTC)**

|            |      |         |
|------------|------|---------|
| DTC_Alix   | 784  | 393380  |
| DTC_Baldur | 21   | 30015   |
| DTC_Benito | 148  | 97417   |
| DTC_CA     | 188  | 44182   |
| DTC_Calvin | 4868 | 5511869 |
| DTC_Carson | 217  | 38003   |

**CACTA (DTC)**

|            |      |         |
|------------|------|---------|
| DTC_Alix   | 533  | 176935  |
| DTC_Baldur | 29   | 20414   |
| DTC_Benito | 140  | 81445   |
| DTC_CA     | 155  | 39953   |
| DTC_Calvin | 3242 | 2099607 |
| DTC_Carson | 193  | 30451   |

|                    |     |        |                    |     |        |
|--------------------|-----|--------|--------------------|-----|--------|
| <i>DTC_Dorian</i>  | 369 | 462820 | <i>DTC_Dorian</i>  | 275 | 185957 |
| <i>DTC_Eric</i>    | 910 | 985533 | <i>DTC_Eric</i>    | 818 | 764744 |
| <i>DTC_Grover</i>  | 622 | 899717 | <i>DTC_Grover</i>  | 406 | 358852 |
| <i>DTC_Isidor</i>  | 285 | 39942  | <i>DTC_Isidor</i>  | 262 | 23194  |
| <i>DTC_Janus</i>   | 63  | 80190  | <i>DTC_Janus</i>   | 55  | 47559  |
| <i>DTC_Radon</i>   | 674 | 200825 | <i>DTC_Radon</i>   | 313 | 93148  |
| <i>DTC_Rufus</i>   | 22  | 43900  | <i>DTC_Rufus</i>   | 22  | 14399  |
| <i>DTC_Sandro</i>  | 67  | 36126  | <i>DTC_Sandro</i>  | 91  | 77862  |
| <i>DTC_Seamus</i>  | 20  | 28388  | <i>DTC_Seamus</i>  | 14  | 10328  |
| <i>DTC_Sherman</i> | 137 | 60215  | <i>DTC_Sherman</i> | 125 | 47558  |
| <i>DTC_Storm</i>   | 209 | 51912  | <i>DTC_Storm</i>   | 198 | 53153  |

**hAT (DTA)**

|                     |     |        |
|---------------------|-----|--------|
| <i>DTA_Coraline</i> | 6   | 15292  |
| <i>DTA_HA</i>       | 16  | 5391   |
| <i>DTA_HB</i>       | 192 | 25657  |
| <i>DTA_HC</i>       | 122 | 19064  |
| <i>DTA_HD</i>       | 482 | 112939 |
| <i>DTA_HE</i>       | 244 | 22866  |
| <i>DTA_HG</i>       | 32  | 4265   |
| <i>DTA_HI</i>       | 22  | 3841   |
| <i>DTA_HJ</i>       | 141 | 32099  |
| <i>DTA_HK</i>       | 92  | 45528  |
| <i>DTA_HL</i>       | 73  | 8737   |
| <i>DTA_MI</i>       | 146 | 20294  |

**hAT (DTA)**

|                     |     |       |
|---------------------|-----|-------|
| <i>DTA_Coraline</i> | 0   | 0     |
| <i>DTA_HA</i>       | 7   | 3248  |
| <i>DTA_HB</i>       | 172 | 24116 |
| <i>DTA_HC</i>       | 108 | 16330 |
| <i>DTA_HD</i>       | 379 | 71570 |
| <i>DTA_HE</i>       | 219 | 20097 |
| <i>DTA_HG</i>       | 37  | 7501  |
| <i>DTA_HI</i>       | 12  | 1654  |
| <i>DTA_HJ</i>       | 118 | 26180 |
| <i>DTA_HK</i>       | 59  | 16344 |
| <i>DTA_HL</i>       | 49  | 5628  |
| <i>DTA_MI</i>       | 162 | 23166 |
