# Supplementary material for: Genome-wide comparison of Asian and African rice reveals high recent activity of DNA transposons
Source: PubMed Central journal article supplement (PMC4423477; doi:10.1186/s13100-015-0040-x), 2015-04-28
Supplement: 13100_2015_40_MOESM4_ESM.pdf [file 13100_2015_40_MOESM4_ESM.pdf]

**Table S2: Overview of all transpositions**

| ID | Excision / Insertion | TE family         | Species          | Chr. | Start <i>O. Sativa</i> | Start <i>O. glaberrima</i> | Target Site                       | bp deleted | bp „Filler“ |
|----|----------------------|-------------------|------------------|------|------------------------|----------------------------|-----------------------------------|------------|-------------|
| 1  | E                    | <i>DTH_TS</i>     | <i>O. sativa</i> | 1    | 11361252               | 7664921                    | TAA                               | 6          | 0           |
| 2  | E                    | <i>DTM_MK</i>     | <i>O. sativa</i> | 1    | 12600385               | 9218754                    | CACCTCTTC / TCACCGTTCT            | 0          | 0           |
| 3  | E                    | <i>DTH_TS</i>     | <i>O. sativa</i> | 1    | 12902570               | 9478733                    | TGA                               | 0          | 13          |
| 4  | E                    | <i>DTT_SAF</i>    | <i>O. sativa</i> | 1    | 14800923               | 10630380                   | TA                                | 0          | 7           |
| 5  | E                    | <i>DTT_SE</i>     | <i>O. sativa</i> | 1    | 2143974                | 1552674                    | TA                                | 0          | 0           |
| 6  | E                    | <i>DTT_SAF</i>    | <i>O. sativa</i> | 1    | 23428568               | 16010989                   | TA                                | 17         | 16          |
| 7  | E                    | <i>DTT_SI</i>     | <i>O. sativa</i> | 1    | 23745110               | 16234979                   | TA                                | 5          | 0           |
| 8  | E                    | <i>DTT_SH</i>     | <i>O. sativa</i> | 1    | 25116785               | 17535109                   | TA                                | 0          | 1           |
| 9  | E                    | <i>DTH_TR</i>     | <i>O. sativa</i> | 1    | 28103748               | 19840941                   | TAA                               | 226        | 0           |
| 10 | E                    | <i>DTT_SE</i>     | <i>O. sativa</i> | 1    | 28983077               | 20649311                   | TA                                | 0          | 3           |
| 11 | E                    | <i>DTT_SA</i>     | <i>O. sativa</i> | 1    | 29919153               | 21479533                   | TA                                | 15         | 0           |
| 12 | E                    | <i>DTM_MA</i>     | <i>O. sativa</i> | 1    | 33811302               | 24353085                   | ATGATAAAT                         | 0          | 11          |
| 13 | E                    | <i>DTH_TAS</i>    | <i>O. sativa</i> | 1    | 35000431               | 25182404                   | TTA                               | 2          | 4           |
| 14 | E                    | <i>DTC_Storm</i>  | <i>O. sativa</i> | 1    | 35288724               | 25434139                   | TAT                               | 1          | 0           |
| 15 | E                    | <i>DTH_TO</i>     | <i>O. sativa</i> | 1    | 41836087               | 31212136                   | TTA                               | 10         | 2           |
| 16 | E                    | <i>DTT_SA</i>     | <i>O. sativa</i> | 1    | 42564941               | 31717319                   | TA                                | 0          | 1           |
| 17 | E                    | <i>DTT_SG</i>     | <i>O. sativa</i> | 1    | 5150324                | 32601125                   | TA                                | 5          | 0           |
| 18 | E                    | <i>DTH_TF</i>     | <i>O. sativa</i> | 1    | 6649385                | 4959981                    | T(A/T)A                           | 6          | 0           |
| 19 | E                    | <i>DTT_SA</i>     | <i>O. sativa</i> | 2    | 11161618               | 9968245                    | TA                                | 3          | 0           |
| 20 | E                    | <i>DTT_SM</i>     | <i>O. sativa</i> | 2    | 1719100                | 1517049                    | TA                                | 0          | 1           |
| 21 | E                    | <i>DTT_SI</i>     | <i>O. sativa</i> | 2    | 21452665               | 17601179                   | TA                                | 0          | 0           |
| 22 | E                    | <i>DTH_TC</i>     | <i>O. sativa</i> | 2    | 21454670               | 17603056                   | TAA/TTC                           | 5          | 0           |
| 23 | E                    | <i>DTH_TA</i>     | <i>O. sativa</i> | 2    | 23428552               | 18987099                   | TT(T/A)                           | 6          | 1           |
| 24 | E                    | <i>DTT_SJ</i>     | <i>O. sativa</i> | 2    | 23974159               | 19453407                   | TA                                | 3          | 2           |
| 25 | E                    | <i>DTT_SG</i>     | <i>O. sativa</i> | 2    | 24072859               | 19545565                   | TA                                | 23         | 161         |
| 26 | E                    | <i>DTT_SH</i>     | <i>O. sativa</i> | 2    | 24169119               | 19638746                   | TA                                | 4          | 3           |
| 27 | E                    | <i>DTT_SJ</i>     | <i>O. sativa</i> | 2    | 27148252               | 21903384                   | TA                                | 23         | 40          |
| 28 | E                    | <i>DTT_SAF</i>    | <i>O. sativa</i> | 2    | 2725089                | 2463419                    | TA                                | 0          | 2           |
| 29 | E                    | <i>DTT_SC</i>     | <i>O. sativa</i> | 2    | 29194337               | 23380769                   | TA                                | 0          | 12          |
| 30 | E                    | <i>DTT_SG</i>     | <i>O. sativa</i> | 2    | 2963631                | 2706943                    | TA                                | 14         | 0           |
| 31 | E                    | <i>DTT_SJ</i>     | <i>O. sativa</i> | 2    | 29890827               | 23874746                   | TA                                | 0          | 3           |
| 32 | E                    | <i>DTT_SG</i>     | <i>O. sativa</i> | 2    | 33608046               | 27128831                   | TA                                | 0          | 9           |
| 33 | E                    | <i>DTH_TI</i>     | <i>O. sativa</i> | 2    | 34472772               | 27883970                   | T(G/A)G                           | 12         | 2           |
| 34 | E                    | <i>DTT_SJ</i>     | <i>O. sativa</i> | 2    | 35122138               | 28412790                   | TA                                | 15         | 38          |
| 35 | E                    | <i>DTH_TG</i>     | <i>O. sativa</i> | 2    | 400997                 | 298568                     | TTA                               | 3          | 0           |
| 36 | E                    | <i>DTT_SM</i>     | <i>O. sativa</i> | 2    | 5051694                | 4634345                    | TA                                | 0          | 1           |
| 37 | E                    | <i>DTT_SJ</i>     | <i>O. sativa</i> | 2    | 5638072                | 5222271                    | TA                                | 0          | 4           |
| 38 | E                    | <i>DTT_SE</i>     | <i>O. sativa</i> | 2    | 6198541                | 5782264                    | TA                                | 10         | 4           |
| 39 | E                    | <i>DTT_SAF</i>    | <i>O. sativa</i> | 2    | 6453078                | 6059730                    | TA                                | 121        | 6           |
| 40 | E                    | <i>DTT_SI</i>     | <i>O. sativa</i> | 2    | 7026569                | 6419915                    | TA                                | 0          | 1           |
| 41 | E                    | <i>DTT_SC</i>     | <i>O. sativa</i> | 2    | 9717969                | 8789082                    | TA                                | 0          | 1           |
| 42 | E                    | <i>DTM_MH</i>     | <i>O. sativa</i> | 3    | 10435100               | 9646653                    | ATATATATATATGTAGAGAGA / TATATATAT | 30         | 0           |
| 43 | E                    | <i>DTT_SA</i>     | <i>O. sativa</i> | 3    | 11552786               | 10620135                   | TA                                | 0          | 1           |
| 44 | E                    | <i>DTT_SC</i>     | <i>O. sativa</i> | 3    | 12452418               | 11480541                   | TA                                | 7          | 0           |
| 45 | E                    | <i>DTH_TAA</i>    | <i>O. sativa</i> | 3    | 12884077               | 11897798                   | TAA                               | 0          | 0           |
| 46 | E                    | <i>DTT_SJ</i>     | <i>O. sativa</i> | 3    | 12918196               | 11942369                   | TA                                | 16         | 4           |
| 47 | I                    | <i>DTH_TG</i>     | <i>O. sativa</i> | 1    | 1029990                | 721289                     | TAA                               | 0          | 0           |
| 48 | I                    | <i>DTH_TAA</i>    | <i>O. sativa</i> | 1    | 10618137               | 8131027                    | TTA                               | 0          | 0           |
| 49 | I                    | <i>DTT_SJ</i>     | <i>O. sativa</i> | 1    | 1090465                | 786248                     | (T/C)A                            | 0          | 0           |
| 50 | I                    | <i>DTT_SJ</i>     | <i>O. sativa</i> | 1    | 1090465                | 786248                     | (T/C)A                            | 0          | 0           |
| 51 | I                    | <i>DTH_TC</i>     | <i>O. sativa</i> | 1    | 11079369               | 8420024                    | TAA                               | 0          | 0           |
| 52 | I                    | <i>DTH_TE</i>     | <i>O. sativa</i> | 1    | 11218178               | 7536702                    | TTA                               | 0          | 0           |
| 53 | I                    | <i>DTH_TAA</i>    | <i>O. sativa</i> | 1    | 11621340               | 32929750                   | TAA                               | 0          | 0           |
| 54 | I                    | <i>DTT_SG</i>     | <i>O. sativa</i> | 1    | 11675762               | 8504832                    | TA                                | 0          | 0           |
| 55 | I                    | <i>DTM_MK</i>     | <i>O. sativa</i> | 1    | 12105841               | 8797684                    | GAGCTGTCAA                        | 0          | 0           |
| 56 | I                    | <i>DTH_TS</i>     | <i>O. sativa</i> | 1    | 12350118               | 9044820                    | TTA                               | 0          | 0           |
| 57 | I                    | <i>DTT_SE</i>     | <i>O. sativa</i> | 1    | 12533001               | 9162528                    | TA                                | 0          | 0           |
| 58 | I                    | <i>DTM_MAA</i>    | <i>O. sativa</i> | 1    | 12664082               | 9283026                    | TTATTTTAA                         | 0          | 0           |
| 59 | I                    | <i>DTM_MAA</i>    | <i>O. sativa</i> | 1    | 12664082               | 9283026                    | TTATTTTAA                         | 0          | 0           |
| 60 | I                    | <i>DTH_TS</i>     | <i>O. sativa</i> | 1    | 12692397               | 9314114                    | CTC                               | 0          | 0           |
| 61 | I                    | <i>DTT_ST</i>     | <i>O. sativa</i> | 1    | 12714106               | 9326341                    | TA                                | 0          | 0           |
| 62 | I                    | <i>DTH_TY</i>     | <i>O. sativa</i> | 1    | 12864182               | 9437759                    | TTA                               | 0          | 0           |
| 63 | I                    | <i>DTT_SI</i>     | <i>O. sativa</i> | 1    | 13501578               | 9686190                    | TA                                | 0          | 0           |
| 64 | I                    | <i>DTM_MA</i>     | <i>O. sativa</i> | 1    | 14126284               | 10258650                   | GTCT(T/A)AACC                     | 0          | 0           |
| 65 | I                    | <i>DTH_TG</i>     | <i>O. sativa</i> | 1    | 14215209               | 10308991                   | TTA                               | 0          | 0           |
| 66 | I                    | <i>DTT_SAF</i>    | <i>O. sativa</i> | 1    | 14798576               | 10627374                   | TA                                | 0          | 0           |
| 67 | I                    | <i>DTC_Calvin</i> | <i>O. sativa</i> | 1    | 15342434               | 10707383                   | TTA                               | 0          | 0           |
| 68 | I                    | <i>DTH_TS</i>     | <i>O. sativa</i> | 1    | 15345607               | 10709775                   | TAA                               | 0          | 0           |
| 69 | I                    | <i>DTC_Calvin</i> | <i>O. sativa</i> | 1    | 15595678               | 10925172                   | TGG                               | 0          | 0           |
| 70 | I                    | <i>DTC_Alix</i>   | <i>O. sativa</i> | 1    | 15903567               | 11201038                   | GAA                               | 0          | 0           |
| 71 | I                    | <i>DTC_Benito</i> | <i>O. sativa</i> | 1    | 17775468               | 12554804                   | CAC                               | 0          | 0           |

|     |  |            |           |   |          |          |                        |    |   |
|-----|--|------------|-----------|---|----------|----------|------------------------|----|---|
| 72  |  | DTM_MK     | O. sativa | 1 | 17931123 | 12708519 | CGTGAATAGA             | 0  | 0 |
| 73  |  | DTH_TF     | O. sativa | 1 | 18852422 | 13491709 | TCA                    | 0  | 0 |
| 74  |  | DTT_SAF    | O. sativa | 1 | 18924946 | 13542799 | TA                     | 0  | 0 |
| 75  |  | DTT_SW     | O. sativa | 1 | 19311706 | 13788640 | TA                     | 0  | 0 |
| 76  |  | DTT_SA     | O. sativa | 1 | 19693153 | 14193910 | TA                     | 0  | 0 |
| 77  |  | DTH_Blip_A | O. sativa | 1 | 20703120 | 14567773 | TAA                    | 0  | 0 |
| 78  |  | DTH_TAI    | O. sativa | 1 | 21066090 | 14732026 | TAA                    | 0  | 0 |
| 79  |  | DTT_SJ     | O. sativa | 1 | 2139659  | 1548391  | TA                     | 0  | 0 |
| 80  |  | DTM_MA     | O. sativa | 1 | 21500172 | 15074350 | TACGGAGAT              | 0  | 0 |
| 81  |  | DTT_SA     | O. sativa | 1 | 21567491 | 15121703 | TA                     | 0  | 0 |
| 82  |  | DTA_HJ     | O. sativa | 1 | 21713076 | 15206684 | AAATAATA               | 0  | 0 |
| 83  |  | DTH_TC     | O. sativa | 1 | 21716777 | 15210337 | TTA                    | 0  | 0 |
| 84  |  | DTT_SJ     | O. sativa | 1 | 21962983 | 15450955 | TA                     | 0  | 0 |
| 85  |  | DTH_TR     | O. sativa | 1 | 22011604 | 15512019 | TCA                    | 0  | 0 |
| 86  |  | DTH_TE     | O. sativa | 1 | 22023762 | 15526376 | TTC                    | 0  | 0 |
| 87  |  | DTT_SG     | O. sativa | 1 | 22242282 | 15723374 | TA                     | 0  | 0 |
| 88  |  | DTH_TC     | O. sativa | 1 | 23690198 | 16180807 | TTA                    | 0  | 0 |
| 89  |  | DTC_Calvin | O. sativa | 1 | 23709314 | 16195468 | CTT                    | 0  | 0 |
| 90  |  | DTT_SAF    | O. sativa | 1 | 23993262 | 16435693 | TA                     | 0  | 0 |
| 91  |  | DTT_SG     | O. sativa | 1 | 24012962 | 16451074 | TA                     | 0  | 0 |
| 92  |  | DTT_SJ     | O. sativa | 1 | 24046421 | 16482148 | TA                     | 0  | 0 |
| 93  |  | DTC_Calvin | O. sativa | 1 | 24046828 | 16482349 | AGG                    | 0  | 0 |
| 94  |  | DTH_TC     | O. sativa | 1 | 24139167 | 16578059 | TAA                    | 0  | 0 |
| 95  |  | DTH_TAO    | O. sativa | 1 | 24409463 | 16831028 | TTA                    | 0  | 0 |
| 96  |  | DTH_TE     | O. sativa | 1 | 24511445 | 16932491 | TAA                    | 0  | 0 |
| 97  |  | DTH_TR     | O. sativa | 1 | 24777404 | 17209381 | TTA                    | 0  | 0 |
| 98  |  | DTH_TAA    | O. sativa | 1 | 24832193 | 17264284 | TTA                    | 0  | 0 |
| 99  |  | DTC_Calvin | O. sativa | 1 | 25208673 | 17622358 | ATT                    | 0  | 0 |
| 100 |  | DTH_TS     | O. sativa | 1 | 25478459 | 17886088 | TTA                    | 0  | 0 |
| 101 |  | DTH_OsKong | O. sativa | 1 | 25587961 | 17971265 | TTA                    | 0  | 0 |
| 102 |  | DTT_SH     | O. sativa | 1 | 25929275 | 18125239 | TA                     | 0  | 0 |
| 103 |  | DTH_TG     | O. sativa | 1 | 25996960 | 18182003 | TAA                    | 0  | 0 |
| 104 |  | DTC_Calvin | O. sativa | 1 | 26149708 | 18304811 | TAA                    | 0  | 0 |
| 105 |  | DTT_SA     | O. sativa | 1 | 26194275 | 18340826 | TA                     | 0  | 0 |
| 106 |  | DTM_MC     | O. sativa | 1 | 26232617 | 18365233 | TTATAAAAT              | 0  | 0 |
| 107 |  | DTH_TC     | O. sativa | 1 | 26615893 | 18676645 | TAA                    | 0  | 0 |
| 108 |  | DTH_TR     | O. sativa | 1 | 26793849 | 18849018 | TAA                    | 0  | 0 |
| 109 |  | DTM_MAB    | O. sativa | 1 | 26800778 | 18857349 | CCCAAATA               | 0  | 0 |
| 110 |  | DTT_SJ     | O. sativa | 1 | 270582   | 195165   | TA                     | 0  | 0 |
| 111 |  | DTC_Calvin | O. sativa | 1 | 26969062 | 18978096 | GGA                    | 0  | 0 |
| 112 |  | DTH_TR     | O. sativa | 1 | 27007522 | 18995540 | TAA                    | 0  | 0 |
| 113 |  | DTC_Benito | O. sativa | 1 | 27056979 | 19052371 | GTA                    | 0  | 0 |
| 114 |  | DTH_TC     | O. sativa | 1 | 27302063 | 19242698 | TTA                    | 0  | 0 |
| 115 |  | DTH_TY     | O. sativa | 1 | 27432878 | 19345246 | TAA                    | 0  | 0 |
| 116 |  | DTH_TAP    | O. sativa | 1 | 2753187  | 2075913  | TTA                    | 0  | 0 |
| 117 |  | DTT_SAF    | O. sativa | 1 | 27810679 | 19645995 | TA                     | 0  | 0 |
| 118 |  | DTC_Calvin | O. sativa | 1 | 27844500 | 19675740 | GTT                    | 0  | 0 |
| 119 |  | DTM_MA     | O. sativa | 1 | 28092931 | 19833547 | CTTTTATT               | 0  | 0 |
| 120 |  | DTC_Grover | O. sativa | 1 | 28175915 | 19900871 | AAG                    | 0  | 0 |
| 121 |  | DTH_TC     | O. sativa | 1 | 2805867  | 2129304  | TAA                    | 0  | 0 |
| 122 |  | DTH_TAD    | O. sativa | 1 | 2806533  | 2129625  | TGA                    | 0  | 0 |
| 123 |  | DTH_TR     | O. sativa | 1 | 28682974 | 20360981 | TTA                    | 0  | 0 |
| 124 |  | DTT_SK     | O. sativa | 1 | 28699841 | 20376114 | TA                     | 0  | 0 |
| 125 |  | DTH_TR     | O. sativa | 1 | 28764004 | 20443867 | TAA                    | 12 | 0 |
| 126 |  | DTH_TC     | O. sativa | 1 | 28818278 | 20498889 | TAA                    | 0  | 0 |
| 127 |  | DTT_SG     | O. sativa | 1 | 2871106  | 2194949  | TA                     | 0  | 0 |
| 128 |  | DTT_SAF    | O. sativa | 1 | 28939358 | 20609588 | TA                     | 0  | 0 |
| 129 |  | DTT_SG     | O. sativa | 1 | 28969568 | 20640436 | TA                     | 0  | 0 |
| 130 |  | DTH_TAI    | O. sativa | 1 | 29000318 | 20666546 | TTA                    | 0  | 0 |
| 131 |  | DTM_MK     | O. sativa | 1 | 29025892 | 20701769 | CACTCTGTT              | 0  | 0 |
| 132 |  | DTH_TAA    | O. sativa | 1 | 29144938 | 20797095 | TTA                    | 0  | 0 |
| 133 |  | DTH_TR     | O. sativa | 1 | 29536779 | 21095477 | TAA                    | 0  | 0 |
| 134 |  | DTH_TAA    | O. sativa | 1 | 29539166 | 21097583 | TTA                    | 0  | 0 |
| 135 |  | DTA_HI     | O. sativa | 1 | 29663519 | 21227687 | ATTGTATT               | 0  | 0 |
| 136 |  | DTH_TAA    | O. sativa | 1 | 29777774 | 21309387 | TTA                    | 0  | 0 |
| 137 |  | DTT_SH     | O. sativa | 1 | 29898371 | 21457014 | TA                     | 0  | 0 |
| 138 |  | DTH_TO     | O. sativa | 1 | 29900074 | 21458466 | TAA                    | 0  | 0 |
| 139 |  | DTT_SI     | O. sativa | 1 | 30637091 | 21978760 | TA                     | 0  | 0 |
| 140 |  | DTT_SJ     | O. sativa | 1 | 3070643  | 2354740  | TA                     | 0  | 0 |
| 141 |  | DTH_TS     | O. sativa | 1 | 30827768 | 22046978 | TCA                    | 0  | 0 |
| 142 |  | DTT_SH     | O. sativa | 1 | 3137939  | 2412828  | TA                     | 0  | 0 |
| 143 |  | DTT_SG     | O. sativa | 1 | 31363808 | 22341475 | TA                     | 0  | 0 |
| 144 |  | DTM_MK     | O. sativa | 1 | 31513352 | 22474800 | TTAGTATTAT / TTAGTACTA | 1  | 0 |
| 145 |  | DTH_TAC    | O. sativa | 1 | 32072664 | 22852509 | TTA                    | 0  | 0 |
| 146 |  | DTT_SC     | O. sativa | 1 | 32526213 | 23235177 | TA                     | 0  | 0 |
| 147 |  | DTH_TR     | O. sativa | 1 | 32527477 | 23236148 | TTA                    | 0  | 0 |
| 148 |  | DTT_SX     | O. sativa | 1 | 32747903 | 23426262 | TA                     | 0  | 0 |
| 149 |  | DTM_MN     | O. sativa | 1 | 32770865 | 23449069 | GCTACAGAA              | 0  | 0 |
| 150 |  | DTT_SG     | O. sativa | 1 | 32773764 | 23451346 | TA                     | 0  | 0 |
| 151 |  | DTM_MU     | O. sativa | 1 | 32793489 | 23471138 | GAATTTGAA              | 0  | 0 |

|     |  |              |           |   |          |          |                          |   |   |
|-----|--|--------------|-----------|---|----------|----------|--------------------------|---|---|
| 152 |  | DTH_TAA      | O. sativa | 1 | 32807445 | 23480472 | TAT                      | 0 | 0 |
| 153 |  | DTH_TO       | O. sativa | 1 | 32809218 | 23481180 | TTA                      | 0 | 0 |
| 154 |  | DTH_TC       | O. sativa | 1 | 32822430 | 23481287 | TAA                      | 0 | 0 |
| 155 |  | DTH_TS       | O. sativa | 1 | 32824934 | 23483357 | TTA                      | 0 | 0 |
| 156 |  | DTH_TR       | O. sativa | 1 | 33177825 | 23827330 | TAA                      | 0 | 0 |
| 157 |  | DTH_TR       | O. sativa | 1 | 33412795 | 24043583 | TAA                      | 0 | 0 |
| 158 |  | DTH_TR       | O. sativa | 1 | 33413061 | 24043849 | TAA                      | 0 | 0 |
| 159 |  | DTM_MAD      | O. sativa | 1 | 33414482 | 24044744 | TTTAAATTT / TTTTITTAATTT | 3 | 0 |
| 160 |  | DTT_SH       | O. sativa | 1 | 33507535 | 24098832 | TA                       | 0 | 0 |
| 161 |  | DTM_MK       | O. sativa | 1 | 33531341 | 24123419 | TAGACCCGA                | 0 | 0 |
| 162 |  | DTC_Calvin   | O. sativa | 1 | 33667361 | 24212843 | CGC                      | 0 | 0 |
| 163 |  | DTT_SA       | O. sativa | 1 | 34275147 | 24687769 | TA                       | 0 | 0 |
| 164 |  | DTA_HK       | O. sativa | 1 | 34506671 | 24875789 | CTCAGGGC(T/C)            | 0 | 0 |
| 165 |  | DTH_TO       | O. sativa | 1 | 34801275 | 24980553 | TTA                      | 0 | 0 |
| 166 |  | DTT_SM       | O. sativa | 1 | 34813658 | 24993091 | TA                       | 0 | 0 |
| 167 |  | DTH_TAF      | O. sativa | 1 | 3489803  | 2723711  | TTA                      | 0 | 0 |
| 168 |  | DTM_MP       | O. sativa | 1 | 34978639 | 25162648 | CGCGGTGCA                | 0 | 0 |
| 169 |  | DTT_SA       | O. sativa | 1 | 34999123 | 25181361 | TA                       | 0 | 0 |
| 170 |  | DTM_MQ       | O. sativa | 1 | 35106477 | 25274490 | ACTAGCAGA                | 0 | 0 |
| 171 |  | DTH_TR       | O. sativa | 1 | 35109128 | 25276535 | TA(A/G)                  | 0 | 0 |
| 172 |  | DTT_SC       | O. sativa | 1 | 35110147 | 25277210 | TA                       | 0 | 0 |
| 173 |  | DTH_TR       | O. sativa | 1 | 35194415 | 25351719 | TAA                      | 0 | 0 |
| 174 |  | DTH_TS       | O. sativa | 1 | 35515368 | 25640062 | TAA                      | 0 | 0 |
| 175 |  | DTC_Grover   | O. sativa | 1 | 35792566 | 25870869 | TTT                      | 0 | 0 |
| 176 |  | DTM_MK       | O. sativa | 1 | 35922945 | 24813066 | ACGGTTAGC                | 0 | 0 |
| 177 |  | DTH_TC       | O. sativa | 1 | 36042918 | 26185229 | TTA                      | 0 | 0 |
| 178 |  | DTT_SJ       | O. sativa | 1 | 3622426  | 22511772 | TA                       | 0 | 0 |
| 179 |  | DTA_Coraline | O. sativa | 1 | 3622629  | 22511975 | CGGAAACC                 | 0 | 0 |
| 180 |  | DTM_MA       | O. sativa | 1 | 36319685 | 26371502 | ATAAATGAG                | 0 | 0 |
| 181 |  | DTH_TC       | O. sativa | 1 | 3637091  | 22489351 | TCA                      | 0 | 0 |
| 182 |  | DTM_MAE      | O. sativa | 1 | 36837071 | 26870950 | GACTCTATG / TAGACTCTATG  | 2 | 0 |
| 183 |  | DTH_TR       | O. sativa | 1 | 37301352 | 27211559 | TTA                      | 0 | 0 |
| 184 |  | DTH_TC       | O. sativa | 1 | 37803012 | 27664111 | TTC                      | 0 | 0 |
| 185 |  | DTH_TX       | O. sativa | 1 | 38202775 | 28020955 | GTT                      | 0 | 0 |
| 186 |  | DTH_TC       | O. sativa | 1 | 38306346 | 28121068 | TCA                      | 0 | 0 |
| 187 |  | DTH_TC       | O. sativa | 1 | 38384786 | 28198855 | TTA                      | 0 | 0 |
| 188 |  | DTH_TC       | O. sativa | 1 | 38488039 | 28312458 | T(C/T)A                  | 0 | 0 |
| 189 |  | DTM_MR       | O. sativa | 1 | 39183038 | 28963448 | ACAATATAA                | 0 | 0 |
| 190 |  | DTM_MA       | O. sativa | 1 | 39235137 | 29002088 | AACTTGATG                | 0 | 0 |
| 191 |  | DTT_SG       | O. sativa | 1 | 393663   | 302172   | TA                       | 0 | 0 |
| 192 |  | DTH_Kong     | O. sativa | 1 | 39536580 | 29286687 | TTA                      | 0 | 0 |
| 193 |  | DTH_TR       | O. sativa | 1 | 394030   | 302302   | TT(A/C)                  | 0 | 0 |
| 194 |  | DTH_TF       | O. sativa | 1 | 39751967 | 29485011 | TTA                      | 0 | 0 |
| 195 |  | DTM_MA       | O. sativa | 1 | 40450026 | 30134455 | GTGTATTTA                | 0 | 0 |
| 196 |  | DTH_TG       | O. sativa | 1 | 40743012 | 30404581 | TAA                      | 0 | 0 |
| 197 |  | DTT_SI       | O. sativa | 1 | 41058142 | 30493453 | TA                       | 0 | 0 |
| 198 |  | DTM_MA       | O. sativa | 1 | 41635434 | 31073955 | TTTATGCAG                | 0 | 0 |
| 199 |  | DTT_SI       | O. sativa | 1 | 41861760 | 31239649 | TA                       | 0 | 0 |
| 200 |  | DTM_MU       | O. sativa | 1 | 41872930 | 31250773 | CATAAGTAA                | 0 | 0 |
| 201 |  | DTH_TS       | O. sativa | 1 | 4180877  | 3397035  | TAA                      | 0 | 0 |
| 202 |  | DTT_SG       | O. sativa | 1 | 42167895 | 31436994 | TA                       | 0 | 0 |
| 203 |  | DTH_TE       | O. sativa | 1 | 42217169 | 31482342 | TTA                      | 0 | 0 |
| 204 |  | DTT_SJ       | O. sativa | 1 | 42228825 | 31493868 | TA                       | 0 | 0 |
| 205 |  | DTH_TX       | O. sativa | 1 | 42265420 | 31530204 | TTA                      | 0 | 0 |
| 206 |  | DTH_TO       | O. sativa | 1 | 42371967 | 31623913 | TTA                      | 0 | 0 |
| 207 |  | DTH_TA       | O. sativa | 1 | 42564757 | 31717272 | TAA                      | 0 | 0 |
| 208 |  | DTT_SC       | O. sativa | 1 | 4248654  | 3451587  | TA                       | 0 | 0 |
| 209 |  | DTM_MA       | O. sativa | 1 | 42968458 | 32086827 | TTAATTAGA                | 0 | 0 |
| 210 |  | DTT_SG       | O. sativa | 1 | 43049231 | 32152731 | TA                       | 0 | 0 |
| 211 |  | DTT_SA       | O. sativa | 1 | 43071509 | 32176237 | TA                       | 0 | 0 |
| 212 |  | DTM_MB       | O. sativa | 1 | 43494073 | 32515318 | TAAGTATT(G/A)            | 0 | 0 |
| 213 |  | DTH_TG       | O. sativa | 1 | 4576059  | 3708481  | TTA                      | 0 | 0 |
| 214 |  | DTT_SX       | O. sativa | 1 | 4828828  | 3865470  | TA                       | 0 | 0 |
| 215 |  | DTM_MK       | O. sativa | 1 | 4836302  | 3873930  | GTCCTATAT                | 0 | 0 |
| 216 |  | DTH_TR       | O. sativa | 1 | 5084440  | 4092388  | TAA                      | 0 | 0 |
| 217 |  | DTT_SA       | O. sativa | 1 | 5148338  | 32599016 | TA                       | 0 | 0 |
| 218 |  | DTH_TS       | O. sativa | 1 | 5270639  | 21558334 | TTA                      | 0 | 0 |
| 219 |  | DTT_SI       | O. sativa | 1 | 5274465  | 21561821 | TA                       | 0 | 0 |
| 220 |  | DTH_TS       | O. sativa | 1 | 5362817  | 4316810  | TTA                      | 0 | 0 |
| 221 |  | DTM_MK       | O. sativa | 1 | 543859   | 433660   | TAATAGGAG                | 0 | 0 |
| 222 |  | DTT_SG       | O. sativa | 1 | 5525433  | 4466706  | TA                       | 0 | 0 |
| 223 |  | DTH_TF       | O. sativa | 1 | 577920   | 473181   | CAA                      | 0 | 0 |
| 224 |  | DTT_SG       | O. sativa | 1 | 612468   | 506197   | TA                       | 0 | 0 |
| 225 |  | DTH_TS       | O. sativa | 1 | 6217023  | 4568566  | TAA                      | 0 | 0 |
| 226 |  | DTT_SG       | O. sativa | 1 | 6282708  | 4634701  | TA                       | 0 | 0 |
| 227 |  | DTH_TAA      | O. sativa | 1 | 6437811  | 4763951  | TTA                      | 0 | 0 |
| 228 |  | DTM_MK       | O. sativa | 1 | 723601   | 593019   | GTGCAAACG                | 0 | 0 |
| 229 |  | DTT_SJ       | O. sativa | 1 | 7270743  | 5514266  | TA                       | 0 | 0 |
| 230 |  | DTT_SG       | O. sativa | 1 | 7303595  | 5542142  | TA                       | 0 | 0 |

|     |   |            |                      |   |          |          |                    |      |     |
|-----|---|------------|----------------------|---|----------|----------|--------------------|------|-----|
| 231 | I | DTH_TR     | <i>O. sativa</i>     | 1 | 7499952  | 5693290  | TTA                | 0    | 0   |
| 232 | I | DTT_SI     | <i>O. sativa</i>     | 1 | 78791    | 33903    | TA                 | 0    | 0   |
| 233 | I | DTT_SJ     | <i>O. sativa</i>     | 1 | 8022493  | 6149028  | TA                 | 0    | 0   |
| 234 | I | DTT_SC     | <i>O. sativa</i>     | 1 | 8084430  | 6224065  | TA                 | 0    | 0   |
| 235 | I | DTH_TO     | <i>O. sativa</i>     | 1 | 8795709  | 6889216  | TAA                | 0    | 0   |
| 236 | I | DTA_HC     | <i>O. sativa</i>     | 1 | 8966844  | 7025200  | ATCAGAAC           | 0    | 0   |
| 237 | I | DTT_SH     | <i>O. sativa</i>     | 1 | 9105981  | 7143780  | TA                 | 0    | 0   |
| 238 | I | DTH_TB     | <i>O. sativa</i>     | 1 | 9690186  | 7307353  | TAA                | 0    | 0   |
| 239 | E | DTH_TA     | <i>O. glaberrima</i> | 1 | 10528347 | 8032425  | TAA                | 4    | 85  |
| 240 | E | DTH_TG     | <i>O. glaberrima</i> | 1 | 10934179 | 8286779  | GGT/ATA            | 0    | 0   |
| 241 | E | DTT_SD     | <i>O. glaberrima</i> | 1 | 12632720 | 9251948  | TA                 | 10   | 0   |
| 242 | E | DTH_TO     | <i>O. glaberrima</i> | 1 | 1339109  | 961268   | TAA                | 0    | 40  |
| 243 | E | DTC_Calvin | <i>O. glaberrima</i> | 1 | 15197276 | 10707364 | TTA                | 0    | 33  |
| 244 | E | DTM_MAC    | <i>O. glaberrima</i> | 1 | 17556651 | 12361801 | AAAATTAAA          | 1    | 0   |
| 245 | E | DTT_SA     | <i>O. glaberrima</i> | 1 | 20924040 | 14704564 | TA                 | 1    | 1   |
| 246 | E | DTT_SQ     | <i>O. glaberrima</i> | 1 | 23493205 | 16063204 | TA                 | 5    | 6   |
| 247 | E | DTH_TC     | <i>O. glaberrima</i> | 1 | 25566676 | 17945502 | TTA                | 0    | 100 |
| 248 | E | DTM_MAA    | <i>O. glaberrima</i> | 1 | 25594551 | 17977187 | TATAATTAA          | 18   | 11  |
| 249 | E | DTH_TG     | <i>O. glaberrima</i> | 1 | 26810539 | 18866867 | TAA                | 0    | 13  |
| 250 | E | DTH_TAE    | <i>O. glaberrima</i> | 1 | 269507   | 194331   | TTA                | 0    | 1   |
| 251 | E | DTM_MK     | <i>O. glaberrima</i> | 1 | 26894172 | 18917971 | TCAGAGTTC          | 0    | 15  |
| 252 | E | DTH_TO     | <i>O. glaberrima</i> | 1 | 27695981 | 19606401 | TTA                | 0    | 0   |
| 253 | E | DTH_TG     | <i>O. glaberrima</i> | 1 | 27698927 | 19608776 | TA(C/A)            | 0    | 9   |
| 254 | E | DTT_SE     | <i>O. glaberrima</i> | 1 | 27706971 | 19614664 | TA                 | 0    | 0   |
| 255 | E | DTT_SJ     | <i>O. glaberrima</i> | 1 | 27807094 | 19642683 | TA                 | 0    | 2   |
| 256 | E | DTT_SS     | <i>O. glaberrima</i> | 1 | 28400216 | 20070370 | TA                 | 18   | 0   |
| 257 | E | DTT_SJ     | <i>O. glaberrima</i> | 1 | 28465845 | 20139126 | TA                 | 0    | 1   |
| 258 | E | DTT_SA     | <i>O. glaberrima</i> | 1 | 28760719 | 20441417 | TA                 | 6    | 0   |
| 259 | E | DTH_TO     | <i>O. glaberrima</i> | 1 | 29925102 | 21491078 | TTA                | 5    | 0   |
| 260 | E | DTT_SAF    | <i>O. glaberrima</i> | 1 | 3047653  | 211339   | TA                 | 0    | 10  |
| 261 | E | DTH_TR     | <i>O. glaberrima</i> | 1 | 32417805 | 23123249 | TTA                | 5    | 0   |
| 262 | E | DTH_TG     | <i>O. glaberrima</i> | 1 | 32844031 | 23502369 | TTA                | 22   | 0   |
| 263 | E | DTH_TS     | <i>O. glaberrima</i> | 1 | 32995743 | 23645250 | CTT/AAT            | 0    | 0   |
| 264 | E | DTT_SC     | <i>O. glaberrima</i> | 1 | 34727057 | 24894673 | TA                 | 2479 | 2   |
| 265 | E | DTM_MK     | <i>O. glaberrima</i> | 1 | 37710749 | 27573608 | CTTGGCGG / GTTCTAA | 0    | 19  |
| 266 | E | DTT_SG     | <i>O. glaberrima</i> | 1 | 3855089  | 3064188  | TA                 | 3    | 4   |
| 267 | E | DTH_TG     | <i>O. glaberrima</i> | 1 | 38726913 | 28525853 | TAA                | 1    | 1   |
| 268 | E | DTT_SI     | <i>O. glaberrima</i> | 1 | 39091831 | 28887455 | TA                 | 0    | 16  |
| 269 | E | DTH_TAG    | <i>O. glaberrima</i> | 1 | 39194889 | 28973586 | TTA                | 0    | 0   |
| 270 | E | DTT_SG     | <i>O. glaberrima</i> | 1 | 397579   | 22916371 | TA                 | 7    | 0   |
| 271 | E | DTH_TR     | <i>O. glaberrima</i> | 1 | 3995117  | 3217237  | TTA                | 19   | 3   |
| 272 | E | DTH_TS     | <i>O. glaberrima</i> | 1 | 40162275 | 29861404 | TAA                | 1    | 0   |
| 273 | E | DTT_SI     | <i>O. glaberrima</i> | 1 | 40377109 | 30069044 | TA                 | 3    | 2   |
| 274 | E | DTH_TG     | <i>O. glaberrima</i> | 1 | 41420991 | 30853691 | TAA                | 1    | 0   |
| 275 | E | DTT_SG     | <i>O. glaberrima</i> | 1 | 41435175 | 30867749 | TA                 | 5    | 14  |
| 276 | E | DTH_TO     | <i>O. glaberrima</i> | 1 | 41475508 | 30910997 | TAA                | 3    | 0   |
| 277 | E | DTT_SM     | <i>O. glaberrima</i> | 1 | 41552023 | 31001343 | TA                 | 0    | 1   |
| 278 | E | DTH_TR     | <i>O. glaberrima</i> | 1 | 41647894 | 31084472 | TAA                | 94   | 0   |
| 279 | E | DTM_MK     | <i>O. glaberrima</i> | 1 | 42159590 | 31430923 | TTTCCAAC           | 12   | 44  |
| 280 | E | DTT_SA     | <i>O. glaberrima</i> | 1 | 42290224 | 31555204 | TA                 | 0    | 0   |
| 281 | E | DTT_SJ     | <i>O. glaberrima</i> | 1 | 4445243  | 3618838  | TA                 | 0    | 5   |
| 282 | E | DTT_SI     | <i>O. glaberrima</i> | 1 | 7088336  | 5381933  | TA                 | 0    | 1   |
| 283 | E | DTT_SG     | <i>O. glaberrima</i> | 1 | 856012   | 627122   | TA                 | 7    | 9   |
| 284 | E | DTM_MAG    | <i>O. glaberrima</i> | 1 | 8527114  | 6669527  | TTACTAGTA          | 15   | 7   |
| 285 | E | DTM_MK     | <i>O. glaberrima</i> | 1 | 8801090  | 6894249  | CCATCTATA          | 14   | 2   |
| 286 | E | DTT_SJ     | <i>O. glaberrima</i> | 2 | 35123671 | 28414477 | TA                 | 54   | 123 |
| 287 | I | DTH_TO     | <i>O. glaberrima</i> | 1 | 10704193 | 8215296  | TTA                | 0    | 0   |
| 288 | I | DTT_ST     | <i>O. glaberrima</i> | 1 | 10875441 | 8234201  | TA                 | 0    | 0   |
| 289 | I | DTH_TW     | <i>O. glaberrima</i> | 1 | 10980969 | 8327093  | T(G/A)             | 0    | 0   |
| 290 | I | DTM_XB     | <i>O. glaberrima</i> | 1 | 11654383 | 8483867  | (T/A)TATTAATT      | 0    | 0   |
| 291 | I | DTA_MI     | <i>O. glaberrima</i> | 1 | 11677212 | 8506567  | TTAG(A/C)ATT       | 0    | 0   |
| 292 | I | DTT_SV     | <i>O. glaberrima</i> | 1 | 12635710 | 9254649  | TA                 | 0    | 0   |
| 293 | I | DTH_TF     | <i>O. glaberrima</i> | 1 | 12680243 | 9299302  | TAA                | 0    | 0   |
| 294 | I | DTM_MZ     | <i>O. glaberrima</i> | 1 | 14801139 | 10630682 | TTTTTAAAA          | 0    | 0   |
| 295 | I | DTM_MA     | <i>O. glaberrima</i> | 1 | 16513446 | 11400157 | ATGTTTCAA          | 0    | 0   |
| 296 | I | DTH_TO     | <i>O. glaberrima</i> | 1 | 17703359 | 12488522 | TCA                | 0    | 0   |
| 297 | I | DTT_SA     | <i>O. glaberrima</i> | 1 | 18924818 | 13542482 | TA                 | 0    | 0   |
| 298 | I | DTH_TO     | <i>O. glaberrima</i> | 1 | 20306244 | 14356850 | TAA                | 0    | 0   |
| 299 | I | DTH_TG     | <i>O. glaberrima</i> | 1 | 20578842 | 14468760 | TTA                | 0    | 0   |
| 300 | I | DTT_SJ     | <i>O. glaberrima</i> | 1 | 2143553  | 1552015  | TA                 | 0    | 0   |
| 301 | I | DTT_SA     | <i>O. glaberrima</i> | 1 | 21677622 | 15174678 | TA                 | 0    | 0   |
| 302 | I | DTT_SAF    | <i>O. glaberrima</i> | 1 | 21968452 | 15456544 | TA                 | 0    | 0   |
| 303 | I | DTT_SG     | <i>O. glaberrima</i> | 1 | 22039788 | 15542210 | TA                 | 0    | 0   |
| 304 | I | DTM_MD     | <i>O. glaberrima</i> | 1 | 22043909 | 15547010 | TTTTTAAAA          | 0    | 0   |
| 305 | I | DTH_TO     | <i>O. glaberrima</i> | 1 | 23434952 | 16017266 | TAA                | 0    | 0   |
| 306 | I | DTT_SG     | <i>O. glaberrima</i> | 1 | 23744590 | 16234223 | TA                 | 0    | 0   |
| 307 | I | DTH_TC     | <i>O. glaberrima</i> | 1 | 24002093 | 16440426 | TTA                | 0    | 0   |
| 308 | I | DTH_TG     | <i>O. glaberrima</i> | 1 | 24019574 | 16458436 | TAA                | 0    | 0   |
| 309 | I | DTM_MC     | <i>O. glaberrima</i> | 1 | 24091648 | 16527920 | ATTCTTCTT          | 0    | 0   |

|     |  |            |               |   |          |          |              |   |   |
|-----|--|------------|---------------|---|----------|----------|--------------|---|---|
| 310 |  | DTT_ST     | O. glaberrima | 1 | 24171930 | 16611975 | TA           | 0 | 0 |
| 311 |  | DTM_MA     | O. glaberrima | 1 | 24692360 | 17122961 | TTATCAGTA    | 0 | 0 |
| 312 |  | DTH_TC     | O. glaberrima | 1 | 25100147 | 17523297 | TAA          | 0 | 0 |
| 313 |  | DTT_SJ     | O. glaberrima | 1 | 25194761 | 17608772 | TA           | 0 | 0 |
| 314 |  | DTM_MA     | O. glaberrima | 1 | 25347445 | 17764949 | AAGAAGCAG    | 0 | 0 |
| 315 |  | DTM_MA     | O. glaberrima | 1 | 25600673 | 17983050 | GTAGTTAAC    | 0 | 0 |
| 316 |  | DTM_MAF    | O. glaberrima | 1 | 25945747 | 18135717 | AGCTTTCAT    | 0 | 0 |
| 317 |  | DTA_HL     | O. glaberrima | 1 | 25945579 | 18135549 | CTTG(C/T)GTC | 0 | 0 |
| 318 |  | DTM_MA     | O. glaberrima | 1 | 2609560  | 1947187  | TTATAGTAG    | 0 | 0 |
| 319 |  | DTH_TAA    | O. glaberrima | 1 | 26160512 | 18314521 | TTA          | 0 | 0 |
| 320 |  | DTH_TS     | O. glaberrima | 1 | 26386988 | 18496175 | TAA          | 0 | 0 |
| 321 |  | DTH_TW     | O. glaberrima | 1 | 27575049 | 19486786 | TAA          | 0 | 0 |
| 322 |  | DTT_SC     | O. glaberrima | 1 | 28157347 | 19879800 | TA           | 0 | 0 |
| 323 |  | DTH_TAA    | O. glaberrima | 1 | 28395887 | 20065798 | TTA          | 0 | 0 |
| 324 |  | DTH_TO     | O. glaberrima | 1 | 28481996 | 20155402 | TTA          | 0 | 0 |
| 325 |  | DTT_SJ     | O. glaberrima | 1 | 28705765 | 20384749 | TA           | 0 | 0 |
| 326 |  | DTH_TF     | O. glaberrima | 1 | 28708553 | 20388052 | AAG          | 0 | 0 |
| 327 |  | DTT_SAF    | O. glaberrima | 1 | 2874183  | 2197794  | TA           | 0 | 0 |
| 328 |  | DTT_SE     | O. glaberrima | 1 | 29263895 | 20875104 | TA           | 0 | 0 |
| 329 |  | DTT_SV     | O. glaberrima | 1 | 29314897 | 20927422 | (G/T)A       | 3 | 1 |
| 330 |  | DTM_MA     | O. glaberrima | 1 | 29432840 | 20999747 | CAGAATCAA    | 0 | 0 |
| 331 |  | DTT_SW     | O. glaberrima | 1 | 29912091 | 21473105 | TA           | 0 | 0 |
| 332 |  | DTH_TS     | O. glaberrima | 1 | 30003221 | 21627040 | T(A/G)A      | 0 | 0 |
| 333 |  | DTH_OsKong | O. glaberrima | 1 | 309517   | 215967   | ATA          | 0 | 0 |
| 334 |  | DTH_TO     | O. glaberrima | 1 | 31313547 | 22303314 | TTA          | 0 | 0 |
| 335 |  | DTT_SAF    | O. glaberrima | 1 | 3139572  | 2414996  | TA           | 0 | 0 |
| 336 |  | DTH_TG     | O. glaberrima | 1 | 3178114  | 2430641  | TAG          | 0 | 0 |
| 337 |  | DTH_TO     | O. glaberrima | 1 | 32063578 | 22843354 | TAA          | 0 | 0 |
| 338 |  | DTH_TO     | O. glaberrima | 1 | 3259560  | 2482799  | TTA          | 0 | 0 |
| 339 |  | DTH_TAA    | O. glaberrima | 1 | 33276263 | 28018512 | TAA          | 0 | 0 |
| 340 |  | DTT_SA     | O. glaberrima | 1 | 3339618  | 2568157  | TA           | 0 | 0 |
| 341 |  | DTT_SAF    | O. glaberrima | 1 | 33583786 | 24151489 | TA           | 0 | 0 |
| 342 |  | DTM_MA     | O. glaberrima | 1 | 34065115 | 24508580 | CTGCCTGGCA   | 0 | 0 |
| 343 |  | DTH_TO     | O. glaberrima | 1 | 34822235 | 25001296 | TTA          | 0 | 0 |
| 344 |  | DTH_TR     | O. glaberrima | 1 | 3484655  | 2718328  | TAA          | 0 | 0 |
| 345 |  | DTH_TO     | O. glaberrima | 1 | 3550993  | 2785464  | TAA          | 0 | 0 |
| 346 |  | DTH_TAJ    | O. glaberrima | 1 | 35550255 | 25669499 | TTA          | 0 | 0 |
| 347 |  | DTH_TAA    | O. glaberrima | 1 | 35647397 | 25747014 | ATA          | 0 | 0 |
| 348 |  | DTT_SC     | O. glaberrima | 1 | 3594651  | 2831363  | TA           | 0 | 0 |
| 349 |  | DTH_TAK    | O. glaberrima | 1 | 3706080  | 22299004 | AAT          | 0 | 0 |
| 350 |  | DTT_SJ     | O. glaberrima | 1 | 37296379 | 27207210 | TA           | 0 | 0 |
| 351 |  | DTH_TR     | O. glaberrima | 1 | 3732134  | 2969271  | TTA          | 0 | 0 |
| 352 |  | DTT_SJ     | O. glaberrima | 1 | 3812501  | 3018181  | TA           | 0 | 0 |
| 353 |  | DTT_SAF    | O. glaberrima | 1 | 3814401  | 3020306  | TA           | 0 | 0 |
| 354 |  | DTH_TC     | O. glaberrima | 1 | 3836196  | 3042879  | TTA          | 0 | 0 |
| 355 |  | DTA_MI     | O. glaberrima | 1 | 38506328 | 28327375 | ACTGGGGC     | 0 | 0 |
| 356 |  | DTH_TO     | O. glaberrima | 1 | 38530142 | 28352552 | TAA          | 0 | 0 |
| 357 |  | DTH_TAL    | O. glaberrima | 1 | 3853727  | 3062262  | (C/T)AA      | 0 | 0 |
| 358 |  | DTT_SJ     | O. glaberrima | 1 | 39049480 | 28844172 | TA           | 0 | 0 |
| 359 |  | DTM_MG     | O. glaberrima | 1 | 39500304 | 29246445 | TTGGGTCCC    | 0 | 0 |
| 360 |  | DTH_TAA    | O. glaberrima | 1 | 39810394 | 29545484 | TTA          | 0 | 0 |
| 361 |  | DTA_HG     | O. glaberrima | 1 | 40648068 | 30313114 | GTGCCAAC     | 0 | 0 |
| 362 |  | DTT_SG     | O. glaberrima | 1 | 40744936 | 30406282 | TA           | 0 | 0 |
| 363 |  | DTT_SD     | O. glaberrima | 1 | 4109883  | 3324756  | TA           | 0 | 0 |
| 364 |  | DTM_MA     | O. glaberrima | 1 | 41353649 | 30791667 | GTATATGTA    | 0 | 0 |
| 365 |  | DTH_TO     | O. glaberrima | 1 | 41474060 | 30909102 | TAA          | 0 | 0 |
| 366 |  | DTT_SAF    | O. glaberrima | 1 | 41481931 | 30917534 | TA           | 0 | 0 |
| 367 |  | DTT_SJ     | O. glaberrima | 1 | 42035990 | 31336175 | TA           | 0 | 0 |
| 368 |  | DTH_TC     | O. glaberrima | 1 | 42140161 | 31410262 | TTA          | 0 | 0 |
| 369 |  | DTH_TAA    | O. glaberrima | 1 | 42273321 | 31537912 | TTA          | 0 | 0 |
| 370 |  | DTH_TW     | O. glaberrima | 1 | 42381359 | 31633231 | TTT          | 0 | 0 |
| 371 |  | DTT_SH     | O. glaberrima | 1 | 42694478 | 31840334 | TA           | 0 | 0 |
| 372 |  | DTT_SW     | O. glaberrima | 1 | 42696092 | 31843109 | TA           | 0 | 0 |
| 373 |  | DTH_TF     | O. glaberrima | 1 | 42696204 | 31843221 | TCA          | 0 | 0 |
| 374 |  | DTH_TG     | O. glaberrima | 1 | 43069280 | 32174013 | AGA          | 0 | 0 |
| 375 |  | DTH_TC     | O. glaberrima | 1 | 43468568 | 32488744 | TAA          | 0 | 0 |
| 376 |  | DTH_TX     | O. glaberrima | 1 | 445049   | 347768   | TTA          | 0 | 0 |
| 377 |  | DTT_SG     | O. glaberrima | 1 | 454212   | 23075768 | TA           | 0 | 0 |
| 378 |  | DTT_SH     | O. glaberrima | 1 | 5138352  | 4145127  | TA           | 0 | 0 |
| 379 |  | DTH_TE     | O. glaberrima | 1 | 6436479  | 4762202  | TTA          | 0 | 0 |
| 380 |  | DTM_MA     | O. glaberrima | 1 | 6513527  | 4837806  | CTTATCCAG    | 0 | 0 |
| 381 |  | DTT_SG     | O. glaberrima | 1 | 655715   | 562531   | TA           | 0 | 0 |
| 382 |  | DTH_TW     | O. glaberrima | 1 | 6672110  | 4982838  | TGA          | 0 | 0 |
| 383 |  | DTT_SH     | O. glaberrima | 1 | 6712193  | 5023409  | TA           | 0 | 0 |
| 384 |  | DTM_MA     | O. glaberrima | 1 | 6993028  | 5274232  | ATCATCAGG    | 0 | 0 |
| 385 |  | DTH_TAI    | O. glaberrima | 1 | 7099266  | 5392844  | TAA          | 0 | 0 |
| 386 |  | DTT_SAF    | O. glaberrima | 1 | 7688404  | 5846504  | TA           | 0 | 0 |
| 387 |  | DTT_SAF    | O. glaberrima | 1 | 8199790  | 6312623  | TA           | 0 | 0 |
| 388 |  | DTH_TO     | O. glaberrima | 1 | 8211756  | 6325553  | TTA          | 0 | 0 |
| 389 |  | DTT_SH     | O. glaberrima | 1 | 8315235  | 6420875  | TA           | 0 | 0 |

|     |  |            |               |   |          |          |              |   |   |
|-----|--|------------|---------------|---|----------|----------|--------------|---|---|
| 390 |  | DTT_SC     | O. glaberrima | 1 | 8405774  | 6513637  | (C/T)A       | 0 | 0 |
| 391 |  | DTH_TC     | O. glaberrima | 1 | 9105923  | 7143130  | GAA          | 0 | 0 |
| 392 |  | DTT_SS     | O. glaberrima | 2 | 10553904 | 9437687  | TA           | 0 | 0 |
| 393 |  | DTT_SN     | O. glaberrima | 2 | 10896325 | 9736395  | TA           | 0 | 0 |
| 394 |  | DTM_MA     | O. glaberrima | 2 | 1097217  | 938744   | AATGCATAA    | 0 | 0 |
| 395 |  | DTT_SC     | O. glaberrima | 2 | 11169256 | 9976064  | TA           | 0 | 0 |
| 396 |  | DTT_SAF    | O. glaberrima | 2 | 1394755  | 1210004  | TA           | 0 | 0 |
| 397 |  | DTT_SJ     | O. glaberrima | 2 | 1441626  | 1258434  | TA           | 0 | 0 |
| 398 |  | DTH_TAA    | O. glaberrima | 2 | 14666538 | 12263634 | TTA          | 0 | 0 |
| 399 |  | DTT_SC     | O. glaberrima | 2 | 15674241 | 13440855 | TA           | 0 | 0 |
| 400 |  | DTT_SI     | O. glaberrima | 2 | 17168914 | 14466443 | TA           | 0 | 0 |
| 401 |  | DTT_SG     | O. glaberrima | 2 | 17192207 | 14497769 | TA           | 0 | 0 |
| 402 |  | DTT_SAC    | O. glaberrima | 2 | 17196700 | 14503820 | TA           | 0 | 0 |
| 403 |  | DTH_TC     | O. glaberrima | 2 | 17225372 | 14531805 | TAA          | 0 | 0 |
| 404 |  | DTH_TAH    | O. glaberrima | 2 | 17330937 | 14599964 | AAT          | 0 | 0 |
| 405 |  | DTH_TX     | O. glaberrima | 2 | 18602093 | 15133289 | TTA          | 0 | 0 |
| 406 |  | DTH_TG     | O. glaberrima | 2 | 18714532 | 15238083 | TTA          | 0 | 0 |
| 407 |  | DTT_SC     | O. glaberrima | 2 | 18743498 | 15260630 | TA           | 0 | 0 |
| 408 |  | DTH_TAA    | O. glaberrima | 2 | 19230476 | 15622651 | T(C/T)A      | 0 | 0 |
| 409 |  | DTM_MA     | O. glaberrima | 2 | 19443668 | 15840060 | TCATAGGAC    | 0 | 0 |
| 410 |  | DTH_OsKong | O. glaberrima | 2 | 19593695 | 15944034 | (C/T)AA      | 0 | 0 |
| 411 |  | DTT_SJ     | O. glaberrima | 2 | 1970138  | 1827656  | TA           | 0 | 0 |
| 412 |  | DTH_TO     | O. glaberrima | 2 | 19833459 | 16144180 | TTA          | 0 | 0 |
| 413 |  | DTT_SAF    | O. glaberrima | 2 | 19840237 | 16154011 | T(G/A)       | 0 | 0 |
| 414 |  | DTM_MS     | O. glaberrima | 2 | 19966452 | 16281051 | TTTCCTGGG    | 0 | 0 |
| 415 |  | DTH_TS     | O. glaberrima | 2 | 19973007 | 16291414 | TAA          | 0 | 0 |
| 416 |  | DTH_TR     | O. glaberrima | 2 | 20255974 | 16590745 | TTA          | 0 | 0 |
| 417 |  | DTT_SC     | O. glaberrima | 2 | 20890086 | 17100541 | TA           | 0 | 0 |
| 418 |  | DTH_TW     | O. glaberrima | 2 | 22071350 | 18147549 | TAA          | 0 | 0 |
| 419 |  | DTT_SAF    | O. glaberrima | 2 | 22550672 | 20584672 | TA           | 0 | 0 |
| 420 |  | DTH_TF     | O. glaberrima | 2 | 23109331 | 18782894 | TAA          | 0 | 0 |
| 421 |  | DTH_TA     | O. glaberrima | 2 | 23448711 | 18987739 | TAA          | 0 | 0 |
| 422 |  | DTT_SH     | O. glaberrima | 2 | 23463034 | 19000706 | TA           | 0 | 0 |
| 423 |  | DTT_SA     | O. glaberrima | 2 | 23483987 | 19014058 | TA           | 0 | 0 |
| 424 |  | DTT_SC     | O. glaberrima | 2 | 23483987 | 19014058 | TA           | 0 | 0 |
| 425 |  | DTH_XAB    | O. glaberrima | 2 | 23483914 | 19013985 | TTA          | 0 | 0 |
| 426 |  | DTT_SA     | O. glaberrima | 2 | 23875953 | 19378042 | TA           | 0 | 0 |
| 427 |  | DTT_SJ     | O. glaberrima | 2 | 24223170 | 19693947 | TA           | 0 | 0 |
| 428 |  | DTT_SA     | O. glaberrima | 2 | 24556077 | 19946822 | TA           | 0 | 0 |
| 429 |  | DTT_SC     | O. glaberrima | 2 | 24788509 | 20153594 | TA           | 0 | 0 |
| 430 |  | DTT_SA     | O. glaberrima | 2 | 26269326 | 21160525 | TA           | 0 | 0 |
| 431 |  | DTH_TS     | O. glaberrima | 2 | 26298533 | 21190083 | TAA          | 0 | 0 |
| 432 |  | DTH_TR     | O. glaberrima | 2 | 2790606  | 2537937  | TTA          | 0 | 0 |
| 433 |  | DTH_TC     | O. glaberrima | 2 | 28324273 | 22784202 | TCA          | 0 | 0 |
| 434 |  | DTH_TW     | O. glaberrima | 2 | 29853205 | 23836422 | TAA          | 0 | 0 |
| 435 |  | DTT_SA     | O. glaberrima | 2 | 30381782 | 24334798 | TA           | 0 | 0 |
| 436 |  | DTT_SG     | O. glaberrima | 2 | 30595276 | 24547218 | TA           | 0 | 0 |
| 437 |  | DTT_SQ     | O. glaberrima | 2 | 30598443 | 24548787 | TA           | 0 | 0 |
| 438 |  | DTM_MA     | O. glaberrima | 2 | 30852649 | 24772080 | TACTTAAAT    | 0 | 0 |
| 439 |  | DTH_TC     | O. glaberrima | 2 | 30931533 | 24850090 | TAA          | 0 | 0 |
| 440 |  | DTT_SX     | O. glaberrima | 2 | 3316804  | 2998021  | TA           | 0 | 0 |
| 441 |  | DTH_TO     | O. glaberrima | 2 | 33403290 | 26932183 | T(T/A)A      | 0 | 0 |
| 442 |  | DTT_SX     | O. glaberrima | 2 | 34012993 | 27513144 | TA           | 0 | 0 |
| 443 |  | DTH_TC     | O. glaberrima | 2 | 34069760 | 27566980 | TCA          | 0 | 0 |
| 444 |  | DTH_TG     | O. glaberrima | 2 | 34390903 | 27813086 | TT(G/A)      | 0 | 0 |
| 445 |  | DTH_TS     | O. glaberrima | 2 | 34795955 | 28118299 | ATA          | 0 | 0 |
| 446 |  | DTH_TAA    | O. glaberrima | 2 | 35140828 | 28433640 | TAA          | 0 | 0 |
| 447 |  | DTT_SC     | O. glaberrima | 2 | 35499378 | 28755574 | TA           | 0 | 0 |
| 448 |  | DTH_TC     | O. glaberrima | 2 | 35775691 | 28976707 | TCA          | 0 | 0 |
| 449 |  | DTH_TAA    | O. glaberrima | 2 | 3757655  | 3442028  | GAG          | 0 | 0 |
| 450 |  | DTT_SG     | O. glaberrima | 2 | 408889   | 305338   | TA           | 0 | 0 |
| 451 |  | DTH_TO     | O. glaberrima | 2 | 4363382  | 3914524  | TAA          | 0 | 0 |
| 452 |  | DTH_TO     | O. glaberrima | 2 | 4749310  | 4315470  | TAA          | 0 | 0 |
| 453 |  | DTH_TC     | O. glaberrima | 2 | 5310357  | 4886128  | GAA          | 0 | 0 |
| 454 |  | DTH_TF     | O. glaberrima | 2 | 5380801  | 4954732  | ATT          | 0 | 0 |
| 455 |  | DTH_TAU    | O. glaberrima | 2 | 5657125  | 5242755  | TAA          | 0 | 0 |
| 456 |  | DTT_SD     | O. glaberrima | 2 | 5855634  | 5442020  | TA           | 0 | 0 |
| 457 |  | DTH_TO     | O. glaberrima | 2 | 5942793  | 5538952  | TTA          | 0 | 0 |
| 458 |  | DTT_SI     | O. glaberrima | 2 | 5955249  | 5569352  | TA           | 0 | 0 |
| 459 |  | DTT_SH     | O. glaberrima | 2 | 6252462  | 5839464  | TA           | 0 | 0 |
| 460 |  | DTT_SA     | O. glaberrima | 2 | 6314603  | 5917863  | TA           | 0 | 0 |
| 461 |  | DTM_MA     | O. glaberrima | 2 | 6762742  | 6141194  | TACATATGG    | 0 | 0 |
| 462 |  | DTM_MD     | O. glaberrima | 2 | 6783930  | 6161308  | TTAAGGAAA    | 0 | 0 |
| 463 |  | DTT_SH     | O. glaberrima | 2 | 7015546  | 6403859  | TA           | 0 | 0 |
| 464 |  | DTT_SG     | O. glaberrima | 2 | 7026769  | 6420238  | TA           | 0 | 0 |
| 465 |  | DTH_TW     | O. glaberrima | 2 | 7071607  | 6467288  | T(T/A)A      | 0 | 0 |
| 466 |  | DTT_SC     | O. glaberrima | 2 | 7305178  | 6709042  | TA           | 0 | 0 |
| 467 |  | DTH_TC     | O. glaberrima | 2 | 7760792  | 7165361  | TTA          | 0 | 0 |
| 468 |  | DTM_MT     | O. glaberrima | 2 | 8021904  | 7474342  | TACCATTATGTA | 0 | 0 |
| 469 |  | DTH_TB     | O. glaberrima | 2 | 8299451  | 7733908  | TTA          | 0 | 0 |

|     |  |         |                      |   |          | -        |           |   |   |
|-----|--|---------|----------------------|---|----------|----------|-----------|---|---|
| 470 |  | DTT_SA  | <i>O. glaberrima</i> | 2 | 8317260  | 7752000  | TA        | 0 | 0 |
| 471 |  | DTM_MA  | <i>O. glaberrima</i> | 2 | 9070596  | 8405297  | TATTTATAA | 0 | 0 |
| 472 |  | DTT_SE  | <i>O. glaberrima</i> | 2 | 9118930  | 8435181  | TA        | 0 | 0 |
| 473 |  | DTT_SH  | <i>O. glaberrima</i> | 2 | 9411322  | 8553775  | TA        | 0 | 0 |
| 474 |  | DTT_SA  | <i>O. glaberrima</i> | 2 | 943835   | 801480   | TA        | 0 | 0 |
| 475 |  | DTH_TAA | <i>O. glaberrima</i> | 3 | 10434766 | 9645591  | (C/T)GA   | 0 | 0 |
| 476 |  | DTH_TW  | <i>O. glaberrima</i> | 3 | 10925359 | 10103886 | TCA       | 0 | 0 |
| 477 |  | DTH_TG  | <i>O. glaberrima</i> | 3 | 10959877 | 10138641 | ATA       | 0 | 0 |
| 478 |  | DTH_TS  | <i>O. glaberrima</i> | 3 | 11460996 | 10512412 | TTA       | 0 | 0 |
| 479 |  | DTH_TO  | <i>O. glaberrima</i> | 3 | 11563899 | 10631536 | TTA       | 0 | 0 |
| 480 |  | DTT_SI  | <i>O. glaberrima</i> | 3 | 12372363 | 11394352 | TA        | 0 | 0 |
| 481 |  | DTT_SG  | <i>O. glaberrima</i> | 3 | 12372711 | 11394939 | TA        | 0 | 0 |
| 482 |  | DTH_TAD | <i>O. glaberrima</i> | 3 | 12397058 | 11419392 | TAG       | 0 | 0 |
| 483 |  | DTM_MAC | <i>O. glaberrima</i> | 3 | 12399247 | 11421625 | TTTTTTTAA | 0 | 0 |
| 484 |  | DTT_SG  | <i>O. glaberrima</i> | 3 | 12435261 | 11463175 | TA        | 0 | 0 |
| 485 |  | DTH_TAB | <i>O. glaberrima</i> | 3 | 12915389 | 11939220 | TTA       | 0 | 0 |
| 486 |  | DTH_TW  | <i>O. glaberrima</i> | 3 | 12931333 | 11956232 | TAC       | 0 | 0 |
| 487 |  | DTM_HA  | <i>O. glaberrima</i> | 3 | 12940204 | 11967304 | CACCGAGAC | 9 | 0 |
